# Supplementary material
Source: PubMed Central journal article supplement (PMC6452875)
Supplement: NIHMS1017553-supplement-ST1.pdf [file NIHMS1017553-supplement-ST1.pdf]

Supplemental Table 1. *Borrelia* strains used in this study. DNA from all strains came from collections maintained at the Bacterial Diseases Branch of the Division of Vector-Borne Diseases, Centers for Disease Control and Prevention (Fort Collins, CO, USA).

| Species                    | Strain <sup>1</sup>                                  | Geographic Source                 | Biological Source              | Reference(s)                               |
|----------------------------|------------------------------------------------------|-----------------------------------|--------------------------------|--------------------------------------------|
| <i>B. burgdorferi</i> s.s. | B31 <sup>T</sup> (ATCC® 35210™)                      | New York                          | <i>I. scapularis</i>           | www.atcc.org                               |
| <i>B. burgdorferi</i> s.s. | IRS (ATCC® 35211™)                                   | Switzerland                       | <i>I. ricinus</i>              | www.atcc.org                               |
| <i>B. burgdorferi</i> s.s. | CA6                                                  | California                        | <i>I. pacificus</i>            | Brown et al. (2006); Margos et al. (2008)  |
| <i>B. burgdorferi</i> s.s. | MN88-0003                                            | Minnesota                         | <i>I. scapularis</i>           | Mathiesen et al. (1997)                    |
| <i>B. burgdorferi</i> s.s. | SI1                                                  | Georgia                           | <i>Peromyscus gossypinus</i>   | Lin et al. (2001); Mathiesen et al. (1997) |
| <i>B. mayonii</i>          | MN14-1420 <sup>T</sup>                               | Upper Midwestern<br>United States | Human blood                    | Pritt et al. (2016)                        |
| <i>B. mayonii</i>          | MN14-1539                                            | Upper Midwestern<br>United States | Human blood                    | Pritt et al. (2016)                        |
| <i>B. miyamotoi</i>        | HT31 <sup>T</sup>                                    | Japan                             | <i>I. persulcatus</i>          | Fukunaga et al. (1995)                     |
| <i>B. miyamotoi</i>        | HT24                                                 | Japan                             | <i>I. persulcatus</i>          | Fukunaga et al. (1995)                     |
| <i>B. miyamotoi</i>        | CT13-2396                                            | Connecticut                       | <i>I. scapularis</i>           | Kingry et al. (2017)                       |
| <i>B. miyamotoi</i>        | RI13-2395                                            | Rhode Island                      | <i>I. scapularis</i>           | Graham et al. (2016) <sup>2</sup>          |
| <i>B. americana</i>        | SCW-41; subgroup A <sup>T</sup><br>(ATCC® BAA-1877™) | South Carolina                    | <i>I. minor</i>                | www.atcc.org; Rudenko et al. (2009b)       |
| <i>B. andersonii</i>       | 21038 (ATCC® 700555™)                                | New York                          | <i>I. dentatus</i>             | www.atcc.org                               |
| <i>B. andersonii</i>       | SI-10                                                | Georgia                           | <i>I. scapularis</i>           | Lin et al. (2001)                          |
| <i>B. bissettae</i>        | DN127 <sup>T</sup>                                   | California                        | <i>I. pacificus</i>            | Margos et al. (2016); Postic et al. (1998) |
| <i>B. bissettae</i>        | CA389                                                | California                        | <i>I. pacificus</i>            | Brown et al. (2006); Margos et al. (2016)  |
| <i>B. californiensis</i>   | CA20                                                 | California                        | <i>Dipodomys californicus</i>  | Margos et al. (2016)                       |
| <i>B. carolinensis</i>     | SCW-22 (ATCC® BAA-1773™)                             | South Carolina                    | <i>I. minor</i>                | www.atcc.org; Rudenko et al. (2009a)       |
| <i>B. kurtenbachii</i>     | 25015 <sup>T</sup> (ATCC® BAA-2495™)                 | New York                          | <i>I. scapularis</i>           | www.atcc.org; Margos et al. (2010)         |
| <i>B. kurtenbachii</i>     | IL96-255                                             | Illinois                          | <i>Microtus pennsylvanicus</i> | Margos et al. (2010)                       |

<sup>T</sup> Denotes type strain

<sup>1</sup> DNA from some strains was prepared from American Type Culture Collection cultures. These strains are indicated by an ATCC number.

<sup>2</sup> Graham et al. (2016) referred to strain RI13-2395 as US178-8(1-1).

## References

- Brown, R.N., Peot, M.A., Lane, R.S., 2006. Sylvatic maintenance of *Borrelia burgdorferi* (Spirochaetales) in Northern California: untangling the web of transmission. *J. Med. Entomol.* 43, 743-51.
- Fukunaga, M., Takahashi, Y., Tsuruta, Y., Matsushita, O., Ralph, D., McClelland, M., Nakao, M., 1995. Genetic and phenotypic analysis of *Borrelia miyamotoi* sp. nov., isolated from the ixodid tick *Ixodes persulcatus*, the vector for Lyme disease in Japan. *Int. J. Syst. Bacteriol.* 45, 804-810.
- Graham, C.B., Pilgard, M.A., Maes, S.E., Hojgaard, A., Eisen, R.J., 2016. Paired real-time PCR assays for detection of *Borrelia miyamotoi* in North American *Ixodes scapularis* and *Ixodes pacificus* (Acari: Ixodidae). *Ticks Tick Borne Dis.* 7, 1230-1235.
- Kingry, L.C., Replogle, A., Batra, D., Rowe, L.A., Sexton, C., Dolan, M., Connally, N., Petersen, J.M., Schriefer, M.E., 2017. Toward a complete North American *Borrelia miyamotoi* genome. *Genome Announc.* 5, e01557-16.
- Lin, T., Oliver, J.H., Jr., Gao, L., Kollars, T.M., Jr., Clark, K.L., 2001. Genetic heterogeneity of *Borrelia burgdorferi* sensu lato in the southern United States based on restriction fragment length polymorphism and sequence analysis. *J. Clin. Microbiol.* 39, 2500-2507.
- Margos, G., Gatewood, A.G., Aanensen, D.M., Hanincova, K., Terekhova, D., Vollmer, S.A., Cornet, M., Piesman, J., Donaghy, M., Bormane, A., Hurn, M.A., Feil, E.J., Fish, D., Casjens, S., Wormser, G.P., Schwartz, I., Kurtenbach, K., 2008. MLST of housekeeping genes captures geographic population structure and suggests a European origin of *Borrelia burgdorferi*. *Proc. Natl. Acad. Sci. U.S.A.* 105, 8730-8735.
- Margos, G., Hojgaard, A., Lane, R.S., Cornet, M., Fingerle, V., Rudenko, N., Ogden, N., Aanensen, D.M., Fish, D., Piesman, J., 2010. Multilocus sequence analysis of *Borrelia bissettii* strains from North America reveals a new *Borrelia* species, *Borrelia kurtenbachii*. *Ticks Tick Borne Dis.* 1, 151-158.
- Margos, G., Lane, R.S., Fedorova, N., Koloczek, J., Piesman, J., Hojgaard, A., Sing, A., Fingerle, V., 2016. *Borrelia bissettiae* sp. nov. and *Borrelia californiensis* sp. nov. prevail in diverse enzootic transmission cycles. *Int. J. Syst. Evol. Microbiol.* 66, 1447-1452.
- Mathiesen, D.A., Oliver, J.H., Jr., Kolbert, C.P., Tullson, E.D., Johnson, B.J., Campbell, G.L., Mitchell, P.D., Reed, K.D., Telford, S.R., 3rd, Anderson, J.F., Lane, R.S., Persing, D.H., 1997. Genetic heterogeneity of *Borrelia burgdorferi* in the United States. *J. Infect. Dis.* 175, 98-107.
- Postic, D., Ras, N.M., Lane, R.S., Henderson, M., Baranton, G., 1998. Expanded diversity among Californian *Borrelia* isolates and description of *Borrelia bissettii* sp. nov. (formerly *Borrelia* group DN127). *J. Clin. Microbiol.* 36, 3497-504.
- Pritt, B.S., Respicio-Kingry, L.B., Sloan, L.M., Schriefer, M.E., Replogle, A.J., Bjork, J., Liu, G., Kingry, L.C., Mead, P.S., Neitzel, D.F., Schiffman, E., Hoang Johnson, D.K., Davis, J.P., Paskewitz, S.M., Boxrud, D., Deedon, A., Lee, X., Miller, T.K., Feist, M.A., Steward, C.R., Theel, E.S., Patel, R., Irish, C.L., Petersen, J.M., 2016. *Borrelia mayonii* sp. nov., a member of the *Borrelia burgdorferi* sensu lato complex, detected in patients and ticks in the upper midwestern United States. *Int. J. Syst. Evol. Microbiol.* 66, 4878-4880.
- Rudenko, N., Golovchenko, M., Grubhoffer, L., Oliver, J.H., Jr., 2009a. *Borrelia carolinensis* sp. nov., a new (14th) member of the *Borrelia burgdorferi* sensu lato complex from the southeastern region of the United States. *J. Clin. Microbiol.* 47, 134-41.
- Rudenko, N., Golovchenko, M., Lin, T., Gao, L., Grubhoffer, L., Oliver, J.H., Jr., 2009b. Delineation of a new species of the *Borrelia burgdorferi* sensu lato complex, *Borrelia americana* sp. nov. *J. Clin. Microbiol.* 47, 3875-3880.
